# Supplementary material for: Admissions and surgery as indicators of hospital functions in Sierra Leone during the west-African Ebola outbreak
Source: PubMed Central journal article supplement (PMC6230245; doi:10.1186/s12913-018-3666-9), 2018-11-09
Supplement: 12913_2018_3666_MOESM1_ESM.pdf [file 12913_2018_3666_MOESM1_ESM.pdf]

| <b>District</b> | <b>Hospital</b>                        | <b>Owner</b>       |
|-----------------|----------------------------------------|--------------------|
| Bo              | Bo Governmental Hospital               | Governmental       |
| Bo              | Gondama Refferal Center                | Private non-profit |
| Bo              | Serabu Catholic Hospital               | Private non-profit |
| Bombali         | Makeni Governmental Hospital           | Governmental       |
| Bombali         | Holy Spirit Hospital                   | Private non-profit |
| Bombali         | Kamakwie Wesleyan Hospital             | Private non-profit |
| Bombali         | Mabenteh Community Hospital            | Private non-profit |
| Bombali         | City Garden Clinic                     | Private for-profit |
| Bonthe          | Bonthe Governmental Hospital           | Governmental       |
| Bonthe          | UMC Mattru hospital                    | Private non-profit |
| Kabala          | Kabala Governmental Hospital           | Governmental       |
| Kailahun        | Kailahun governmental hospital         | Governmental       |
| Kailahun        | Nixon Memorial Hospital Segbwema       | Private non-profit |
| Kambia          | Kambia Governmental Hospital           | Governmental       |
| Kenema          | Kenema Governmental Hospital           | Governmental       |
| Kenema          | Anmaqiya Muslim Hospital               | Private non-profit |
| Kenema          | Panguma Hospital                       | Private non-profit |
| Kono            | Koidu Governmental. Hospital           | Governmental       |
| Moyamba         | Moyamba Governmental Hospital          | Governmental       |
| Port Loko       | Port Loko Governmental Hospital        | Governmental       |
| Port Loko       | Lungi Governmental Hospital            | Governmental       |
| Port Loko       | Bai Bureh Memorial Community Hospital  | Private non-profit |
| Port Loko       | St. John of God Catholic Hospital      | Private non-profit |
| Pujehun         | Pujehun Governmental Hospital          | Governmental       |
| Tonkolili       | Lion Heart Medical Center              | Private non-profit |
| Tonkolili       | Masanga Hospital                       | Private non-profit |
| Tonkolili       | Magburaka Governmental Hospital        | Governmental       |
| Western Area    | Princess Christiana Maternety Hospital | Governmental       |
| Western Area    | King Harman Rd. Hospital               | Governmental       |
| Western Area    | Rokupa Governmental Hospital           | Governmental       |
| Western Area    | Wilberforce Military Hospital          | Governmental       |
| Western Area    | Connaught Hospital                     | Governmental       |
| Western Area    | Lumley Governmental Hospital           | Governmental       |
| Western Area    | Choitram Hospital                      | Private non-profit |
| Western Area    | Aberdeen Woman Center                  | Private non-profit |
| Western Area    | Waterloo Adventist Hospital            | Private non-profit |
| Western Area    | Emergency Hospital                     | Private non-profit |
| Western Area    | Davidson nicol                         | Private for-profit |
| Western Area    | Abernita Hospial                       | Private for-profit |
| Western Area    | Dr Sambas clinic                       | Private for-profit |
